# Supplementary material for: A contact study in hole conductor free perovskite solar cells with low temperature processed carbon electrodes
Source: Royal Society of Chemistry journal article supplement (doi:10.1039/c7ra00066a), 2017-01-01
Supplement: c7ra00066a1.pdf [file c7ra00066a1.pdf]

# A Contact Study in Hole Conductor Free Perovskite Solar Cells with Low Temperature Processed Carbon Electrodes

## Supporting information

J. Li,<sup>1,2</sup> J. X. Yao,<sup>2</sup> X. Y. Liao,<sup>2,3</sup> R. L. Yu,<sup>2</sup> H.R. Xia,<sup>1,2</sup> W. T. Sun,<sup>2,3\*</sup> and L. M. Peng<sup>1,2\*</sup>

<sup>1</sup> Academy for Advanced Interdisciplinary Studies, Peking University, Beijing 100871, China

<sup>2</sup> Key Laboratory for the Physics and Chemistry of Nanodevices and Department of electronics, Peking University, Beijing 100871, China

<sup>3</sup> School of Software and Microelectronics, Peking University, Beijing 100871, China

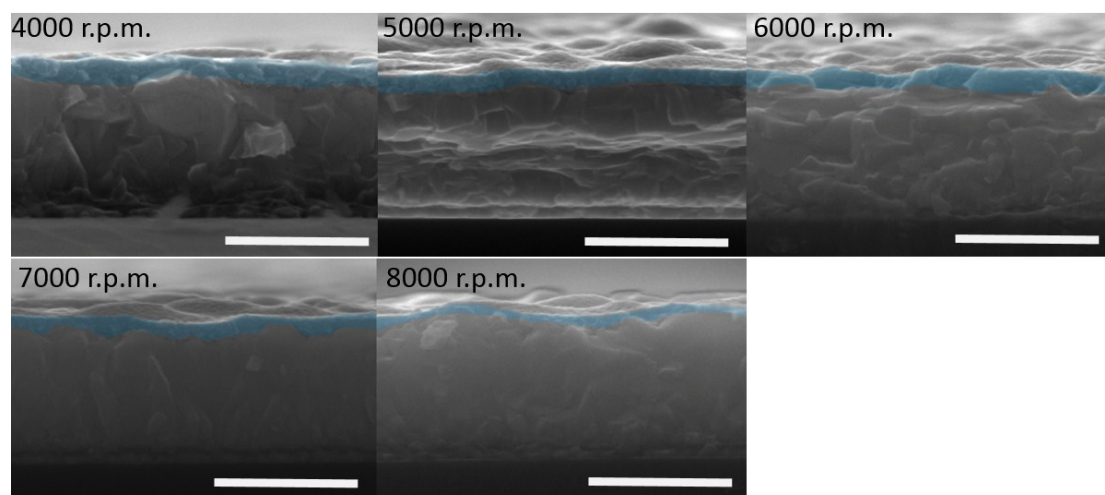

Fig. S1. Cross-sectional SEM images of TiO<sub>2</sub> compact layer (Scale bar: 500 nm)

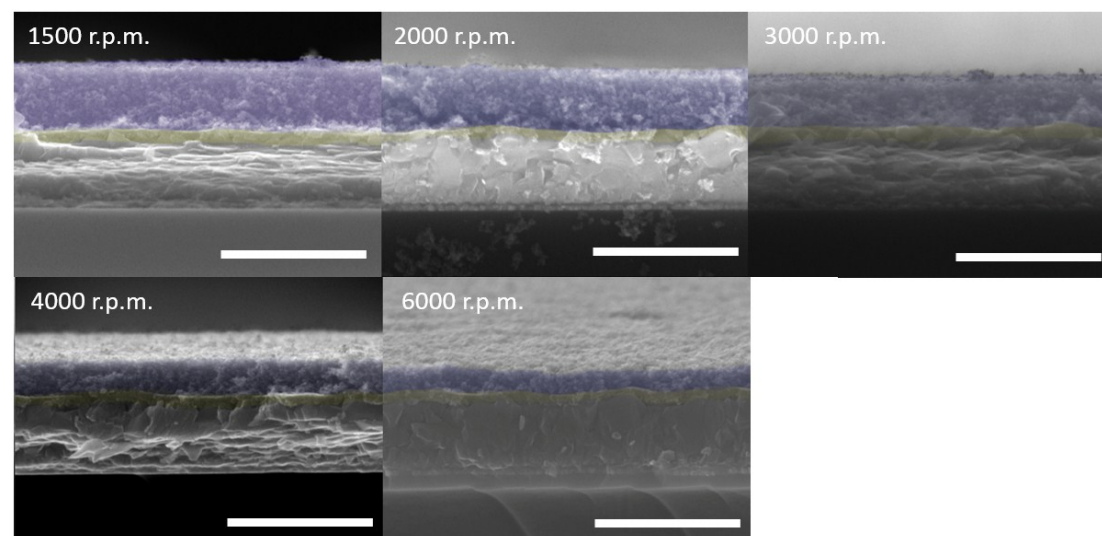

Fig. S2. Cross-sectional SEM images of TiO<sub>2</sub> mesoporous layer (Scale bar: 1 μm)

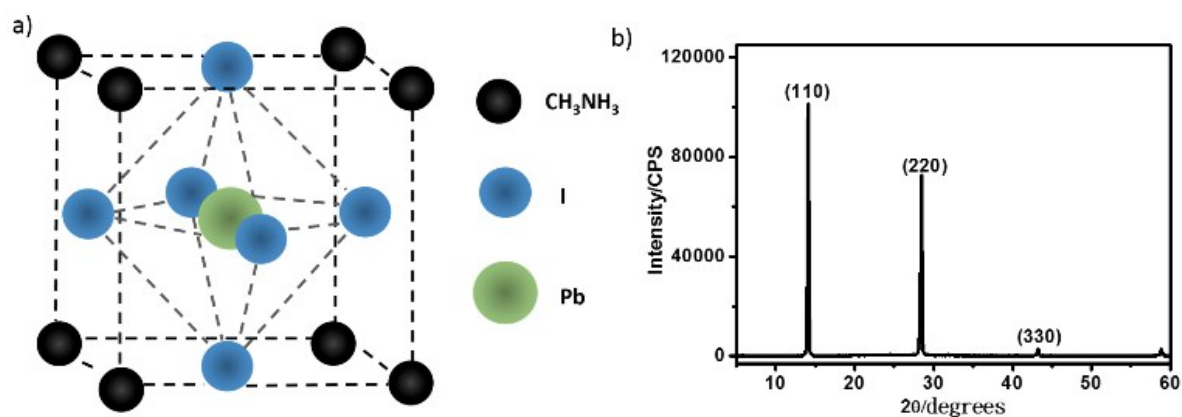

Fig. S3. a) Schematic crystal structure of perovskite  $\text{ABX}_3$  ( $\text{A}=\text{CH}_3\text{NH}_3$ ,  $\text{B}=\text{Pb}$ ,  $x=\text{I}$ ), b) XRD pattern of the perovskite.

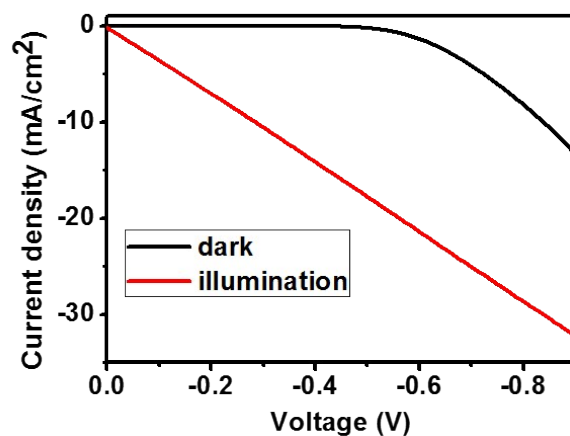

Fig. S4. J-V curves of a device with carbon on pure  $\text{TiO}_2$  in dark and under illumination

**Hysteresis effects:** The hysteresis effects of the devices were also discussed by measuring J-V curves with different scan directions and scan rates (Fig. S5). The photovoltaic parameters are shown in Table S1 and Table S2. The device obtained efficiency of 10.0% by backward direction scanning and 6.9% by forward direction scanning. Though J-V curves were quite different with different scanning direction, they varied slightly with different scanning rates. The efficiency were 10.4% and 10.1% with the scanning rates of 100 mV/s and 50 mV/s, respectively.

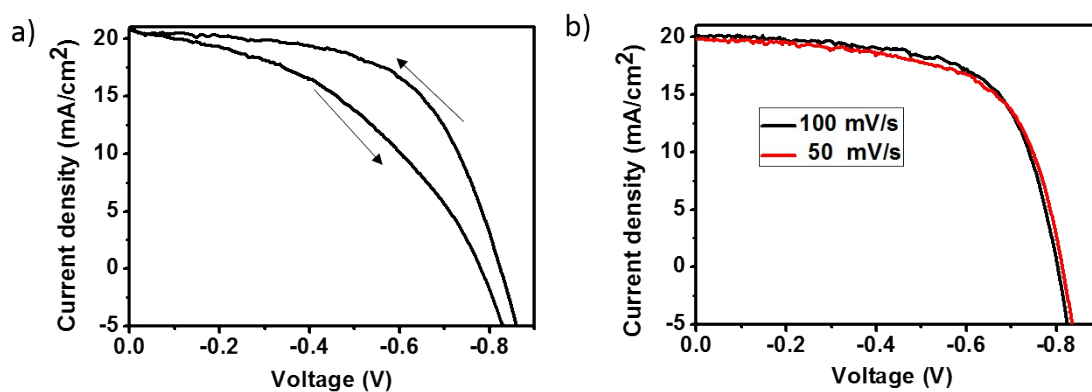

Fig. S5. J-V curves of a device a) with different scan directions, b) with different scan rates

Table S1. Photovoltaic parameters of a device with different J-V scanning directions.

| Scan direction | $J_{sc}(\text{mA}/\text{cm}^2)$ | $V_{oc}(V)$ | $FF$  | $\eta(\%)$ |
|----------------|---------------------------------|-------------|-------|------------|
| backward       | 20.8                            | 0.820       | 0.586 | 10.0       |
| forward        | 20.8                            | 0.780       | 0.425 | 6.9        |

Table S2. Photovoltaic parameters of a device with different J-V scanning rates.

| Scan rates | $J_{sc}(\text{mA}/\text{cm}^2)$ | $V_{oc}(V)$ | $FF$  | $\eta(\%)$ |
|------------|---------------------------------|-------------|-------|------------|
| 100 mV/s   | 20.1                            | 0.803       | 0.644 | 10.4       |
| 50 mV/s    | 19.8                            | 0.815       | 0.626 | 10.1       |

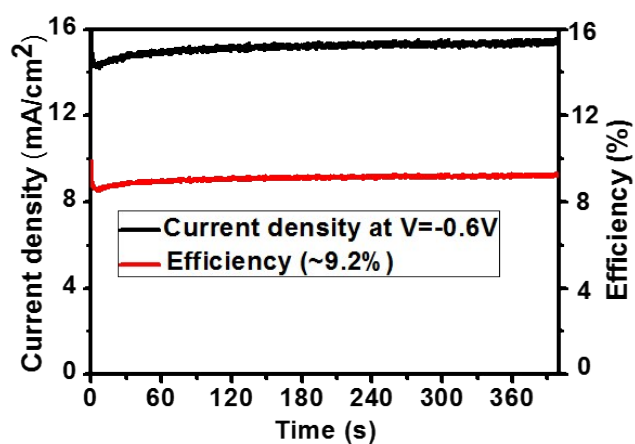

Fig. S6. The stabilized output of current density and photoelectrical efficiency of a device at voltage of -0.6V.

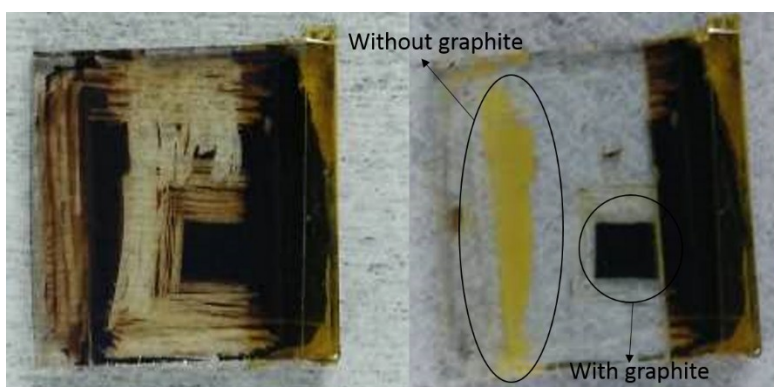

Fig. S7. Photographs of a device before and after immersing in water for 1 minutes.

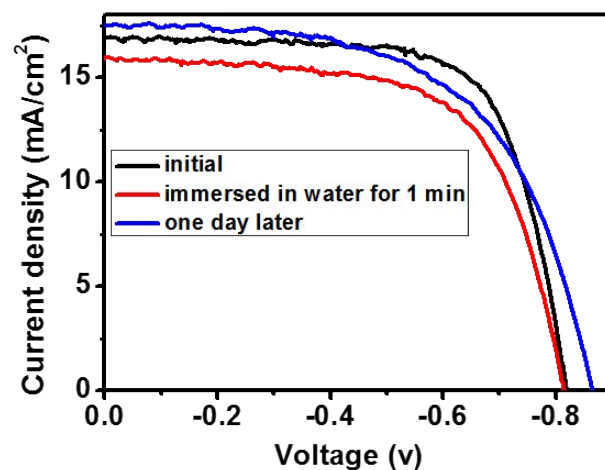

Fig. S8. J-V curves of devices before and after immersing in water for 1 minutes and after 1 day in ambient atmosphere.

Table S3. Photovoltaic parameters of a device before and after immersing in water for 1 minutes and after 1 day in ambient atmosphere.

| Samples        | $J_{sc}(\text{mA}/\text{cm}^2)$ | $V_{oc}(V)$ | $FF$  | $\eta(\%)$ |
|----------------|---------------------------------|-------------|-------|------------|
| initial        | 16.9                            | 0.818       | 0.703 | 9.72       |
| 1 min in water | 15.9                            | 0.814       | 0.642 | 8.31       |
| 1 day later    | 17.5                            | 0.864       | 0.591 | 8.93       |
